# Supplementary material for: Structural controls of 2D sheet copper(i) ethylene and carbonyl coordination polymers directed by anions and solvents
Source: Royal Society of Chemistry journal article supplement (doi:10.1039/c2ce25211b), 2012-01-01
Supplement: c2ce25211b.pdf [file c2ce25211b.pdf]

[Electronic Supplementary Information (ESI)]

**Structural controls of 2-D sheet copper(I) ethylene and carbonyl coordination polymers directed by anions and solvents**

Masahiko Maekawa,<sup>\*a</sup> Toshi Tominaga,<sup>b</sup> Kuniyoshi Sugimoto,<sup>c</sup> Takashi Okubo,<sup>b</sup> Takayoshi Kuroda-Sowa,<sup>b</sup> Megumu Munakata<sup>b</sup> and Susumu Kitagawa<sup>d</sup>

<sup>a</sup> *Research Institute for Science and Technology, Kinki University, Kowakae, Higashi-Osaka, Osaka 577-8502, Japan. E-mail: maekawa@rist.kindai.ac.jp*

<sup>b</sup> *Department of Chemistry, Kinki University, Kowakae, Higashi-Osaka, Osaka 577-8502, Japan*

<sup>c</sup> *Research and Utilization Division, Japan Synchrotron Radiation Research Institute, Kouto, Sayo-cho, Sayo-gun, Hyogo 679-5198, Japan*

<sup>d</sup> *Department of Synthetic Chemistry and Biological Chemistry, Graduate School of Engineering, Kyoto University, Katsura, Nishikyo-ku, Kyoto 615-8510, Japan.*

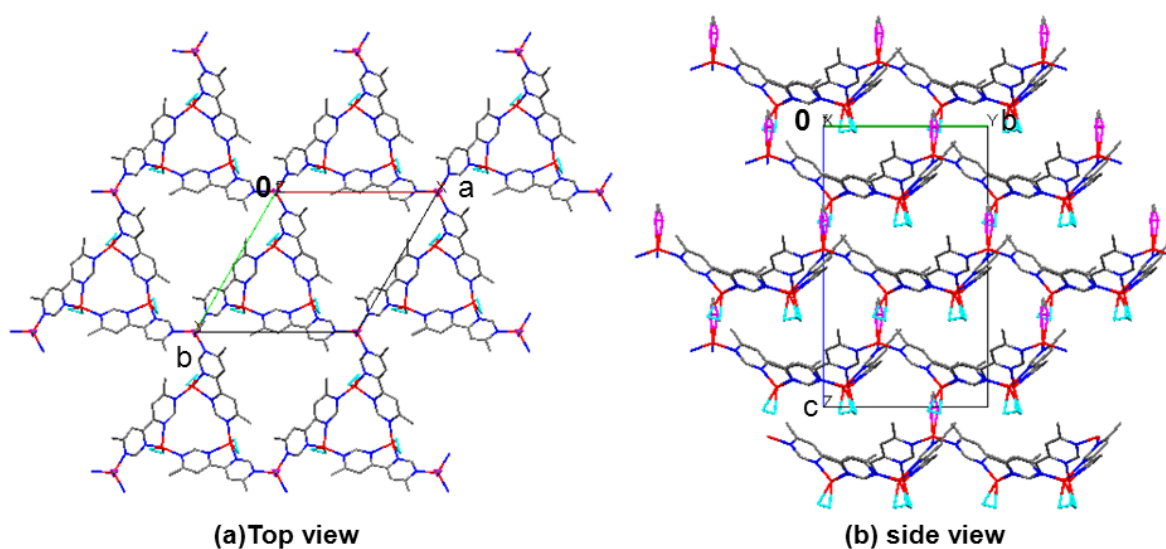

**Fig. S-1** X-ray crystal packing structures of complex **3** along c-axis (a) and a-axis (b). The encapsulating ClO<sub>4</sub><sup>-</sup> anions were omitted for clarity.

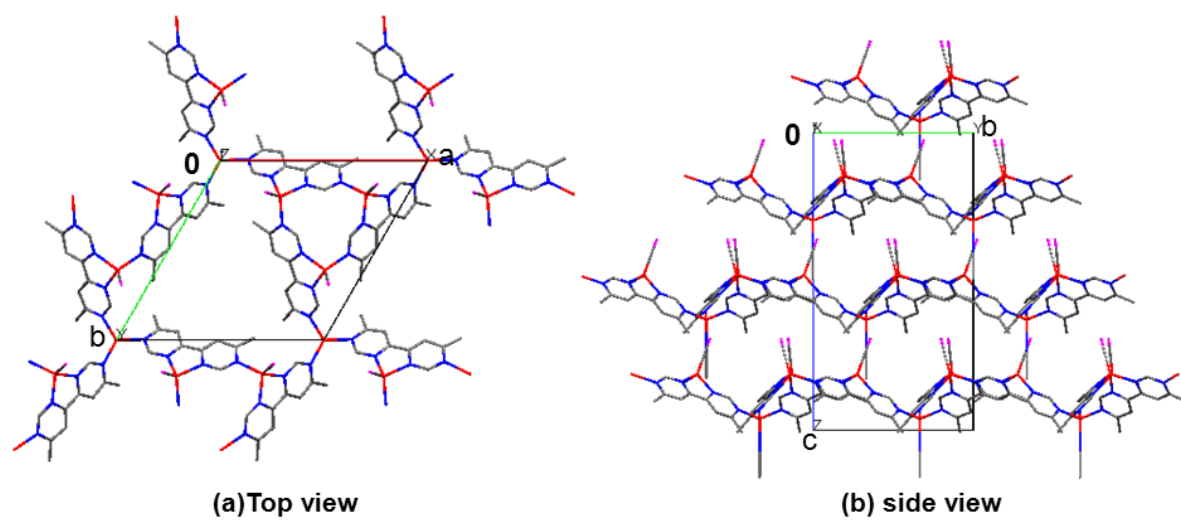

**Fig. S-2** X-ray crystal packing structures of complex **4** along c-axis (a) and a-axis (b). The encapsulating MeCN and  $\text{PF}_6^-$  anions were omitted for clarity.
